# Supplementary material
Source: Springer Nature journal article supplement (https://www.springermedizin.de/resource/supplementary/13099_2012_81_MOESM3_ESM.pdf/9665498)

**a**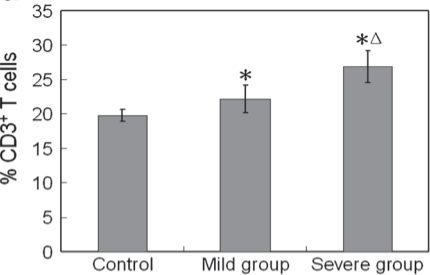**b**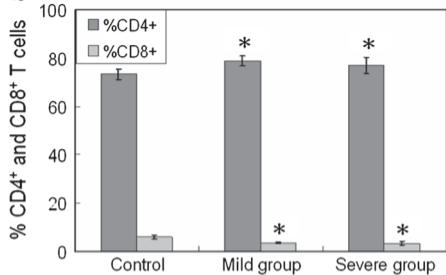**c**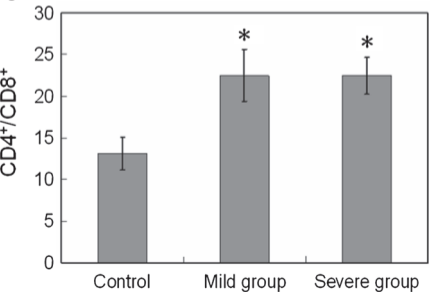**d**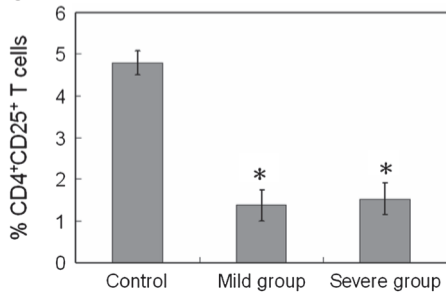

Supplement: MOESM3 [file 9665498]
